# Supplementary material
Source: ML conference proceedings conference paper supplement (https://proceedings.neurips.cc/paper_files/paper/2019/hash/57bafb2c2dfeefba931bb03a835b1fa9-Abstract.html)
Supplement: Supplementary file [file 57bafb2c2dfeefba931bb03a835b1fa9-Supplemental.zip]

## Supplementary Material

Table S.1: Brief characterization of typical features of the 5 sleep stages as defined by the AASM manual [Iber and AASM, 2007].

| Name      | Encoding | Description                                                                                                                                                                                                          |
|-----------|----------|----------------------------------------------------------------------------------------------------------------------------------------------------------------------------------------------------------------------|
| Wake      | W        | Spans wakefulness to drowsiness. Consists of at least 50% alpha waves (8-13 Hz EEG signals). Rapid and reading eye movements. Eye blinks may occur.                                                                  |
| Non-REM 1 | N1       | Short, light sleep stage comprising about 5%-10% of a night's sleep. Dominated by theta waves (4-7 Hz EEG signals). Slow eye movements in W $\rightarrow$ N1 transition. Some EMG activity, but lower than wake.     |
| Non-REM 2 | N2       | Comprises 40%-50% of a normal night's sleep. EEG displays theta-waves like N1, but intercepted by so-called K-complexes and/or sleep spindles (short bursts of 13-16Hz EEG signal).                                  |
| Non-REM 3 | N3       | Comprises about 20%-25% of a typical night's sleep. High amplitude, slow 0.3-3 Hz EEG signals. Low EMG activity.                                                                                                     |
| REM       | R        | Rapid-eye-movements may occur. Displays both theta waves and alpha (like wake), but typically 1-2 Hz slower. EMG significantly reduced. Dreaming may occur this stage, which comprises 20%-25% of the night's sleep. |

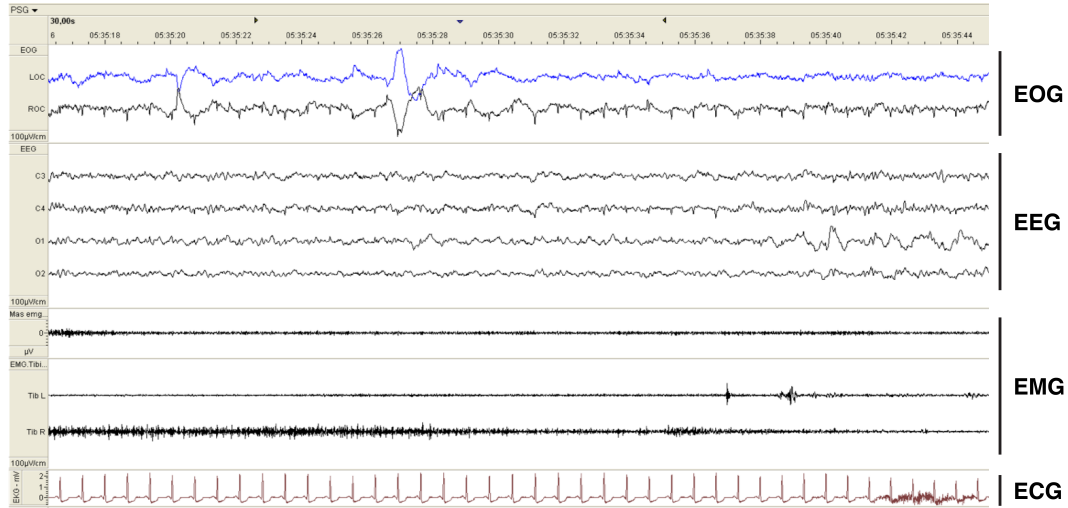

Figure S.1: A segment of 30 seconds of a typical polysomnography (PSG) study showing multiple EOG, EEG, EMG and ECG channels. Human experts evaluate segments such as this and assign it to one of the sleep stages in {W, N1, N2, N3, R}. In most experiments of this study, U-Time considers only a single EEG channel (for instance C3, as seen above).

Table S.2: U-Time model topology. Layer dimensions below are valid for  $i = 3000$ ,  $C = 1$ ,  $T = 35$ ,  $K = 5$ . BN = batch normalization. All convolution kernels in layer 1 to 16 (the encoder) are dilated to with 9.

| ID | Layer Type                   | Output dim                | Kernel | Filters | Activation | Pad   |
|----|------------------------------|---------------------------|--------|---------|------------|-------|
| 1  | Input                        | $35 \times 3000 \times 1$ | -      | -       | -          | -     |
| 2  | Reshape                      | $105000 \times 1$         | -      | -       | -          | -     |
| 3  | Convolution $\rightarrow$ BN | $105000 \times 16$        | 5      | 16      | ReLU       | same  |
| 4  | Convolution $\rightarrow$ BN | $105000 \times 16$        | 5      | 16      | ReLU       | same  |
| 5  | Max Pool                     | $10500 \times 16$         | 10     | -       | -          | valid |
| 6  | Convolution $\rightarrow$ BN | $10500 \times 32$         | 5      | 32      | ReLU       | same  |
| 7  | Convolution $\rightarrow$ BN | $10500 \times 32$         | 5      | 32      | ReLU       | same  |
| 8  | Max Pool                     | $1312 \times 32$          | 8      | -       | -          | valid |
| 9  | Convolution $\rightarrow$ BN | $1312 \times 64$          | 5      | 64      | ReLU       | same  |
| 10 | Convolution $\rightarrow$ BN | $1312 \times 64$          | 5      | 64      | ReLU       | same  |
| 11 | Max Pool                     | $218 \times 64$           | 6      | -       | -          | valid |
| 12 | Convolution $\rightarrow$ BN | $218 \times 128$          | 5      | 128     | ReLU       | same  |
| 13 | Convolution $\rightarrow$ BN | $218 \times 128$          | 5      | 128     | ReLU       | same  |
| 14 | Max Pool                     | $54 \times 128$           | 4      | -       | -          | valid |
| 15 | Convolution $\rightarrow$ BN | $54 \times 256$           | 5      | 256     | ReLU       | same  |
| 16 | Convolution $\rightarrow$ BN | $54 \times 256$           | 5      | 256     | ReLU       | same  |
| 17 | Up-sample                    | $216 \times 256$          | 4      | -       | -          | -     |
| 18 | Convolution $\rightarrow$ BN | $216 \times 128$          | 4      | 128     | ReLU       | same  |
| 19 | Crop & Concat(13, 18)        | $216 \times 256$          | -      | -       | -          | -     |
| 20 | Convolution $\rightarrow$ BN | $216 \times 128$          | 5      | 128     | ReLU       | same  |
| 21 | Convolution $\rightarrow$ BN | $216 \times 128$          | 5      | 128     | ReLU       | same  |
| 22 | Up-sample                    | $1296 \times 128$         | 6      | -       | -          | -     |
| 23 | Convolution $\rightarrow$ BN | $1296 \times 64$          | 6      | 64      | ReLU       | same  |
| 24 | Crop & Concat(10, 23)        | $1296 \times 128$         | -      | -       | -          | -     |
| 25 | Convolution $\rightarrow$ BN | $1296 \times 64$          | 5      | 64      | ReLU       | same  |
| 26 | Convolution $\rightarrow$ BN | $1296 \times 64$          | 5      | 64      | ReLU       | same  |
| 27 | Up-sample                    | $10368 \times 64$         | 8      | -       | -          | -     |
| 28 | Convolution $\rightarrow$ BN | $10368 \times 32$         | 8      | 32      | ReLU       | same  |
| 29 | Crop & Concat(7, 28)         | $10368 \times 64$         | -      | -       | -          | -     |
| 30 | Convolution $\rightarrow$ BN | $10368 \times 32$         | 5      | 32      | ReLU       | same  |
| 31 | Convolution $\rightarrow$ BN | $10368 \times 32$         | 5      | 32      | ReLU       | same  |
| 32 | Up-sample                    | $103680 \times 32$        | 10     | -       | -          | -     |
| 33 | Convolution $\rightarrow$ BN | $103680 \times 16$        | 10     | 16      | ReLU       | same  |
| 34 | Crop & Concat(4, 33)         | $103680 \times 32$        | -      | -       | -          | -     |
| 36 | Convolution $\rightarrow$ BN | $103680 \times 16$        | 5      | 16      | ReLU       | same  |
| 35 | Convolution $\rightarrow$ BN | $103680 \times 16$        | 5      | 16      | ReLU       | same  |
| 36 | Convolution                  | $103680 \times 5$         | 1      | 5       | TanH       | same  |
| 37 | Zero padding                 | $105000 \times 5$         | -      | -       | -          | -     |
| 38 | Reshape                      | $35 \times 3000 \times 5$ | -      | -       | -          | -     |
| 38 | Average Pooling              | $35 \times 5$             | -      | -       | -          | valid |
| 39 | Convolution                  | $35 \times 5$             | 1      | 5       | Softmax    | same  |

**Trainable parameters:** 1,187,589

Table S.3: Hyperparameters used for all datasets.

| Parameter                           | Value                    | Notes                                                                                                                                                                                                                                                                                                                                                                                                                                                                                       |
|-------------------------------------|--------------------------|---------------------------------------------------------------------------------------------------------------------------------------------------------------------------------------------------------------------------------------------------------------------------------------------------------------------------------------------------------------------------------------------------------------------------------------------------------------------------------------------|
| Optimizer                           | Adam                     | We employ a fixed learning rate across all datasets. See [Kingma and Ba, 2014].                                                                                                                                                                                                                                                                                                                                                                                                             |
| <i>Learning rate</i> -              | $5 \cdot 10^{-6}$        |                                                                                                                                                                                                                                                                                                                                                                                                                                                                                             |
| $\beta_1$ -                         | 0.9                      |                                                                                                                                                                                                                                                                                                                                                                                                                                                                                             |
| $\beta_2$ -                         | 0.999                    |                                                                                                                                                                                                                                                                                                                                                                                                                                                                                             |
| $\epsilon$ -                        | $1 \cdot 10^{-8}$        |                                                                                                                                                                                                                                                                                                                                                                                                                                                                                             |
| Loss function                       | Dice loss                | See [Sudre et al., 2017, Crum et al., 2006].                                                                                                                                                                                                                                                                                                                                                                                                                                                |
| <i>Regularization</i> -             | None                     |                                                                                                                                                                                                                                                                                                                                                                                                                                                                                             |
| <i>Class balancing</i> -            | Uniform (None)           |                                                                                                                                                                                                                                                                                                                                                                                                                                                                                             |
| Base Topology                       | 1D U-Net                 | The input dimensionality is the number of data points in a single PSG segment (one segment is 30 seconds in typical sleep staging, giving input dimensionality 3000 for sample rate $S = 100$ ). $T$ is the number of contiguous segments the model operates on at once. $T$ may be dynamically adjusted. Cropping and zero-padding is needed to decode to dimensions equal to the input, see [Ronneberger et al., 2015, Odena et al., 2016, Ioffe and Szegedy, 2015, Yu and Koltun, 2015]. |
| <i>Input dim</i> -                  | 3000                     |                                                                                                                                                                                                                                                                                                                                                                                                                                                                                             |
| <i>Window size (T)</i> -            | 35                       |                                                                                                                                                                                                                                                                                                                                                                                                                                                                                             |
| <i>Depth</i> -                      | 4                        |                                                                                                                                                                                                                                                                                                                                                                                                                                                                                             |
| <i>Up-sampling</i> -                | Nearest neighbour        |                                                                                                                                                                                                                                                                                                                                                                                                                                                                                             |
| <i>Activations</i> -                | ReLU                     |                                                                                                                                                                                                                                                                                                                                                                                                                                                                                             |
| <i>Conv. kernel size</i> -          | 5                        |                                                                                                                                                                                                                                                                                                                                                                                                                                                                                             |
| <i>Conv. kernel dilation size</i> - | 9                        |                                                                                                                                                                                                                                                                                                                                                                                                                                                                                             |
| <i>Max-pool kernel size</i> -       | {10, 8, 6, 4}            |                                                                                                                                                                                                                                                                                                                                                                                                                                                                                             |
| <i>Padding</i> -                    | True ('same')            |                                                                                                                                                                                                                                                                                                                                                                                                                                                                                             |
| <i>Batch normalization</i> -        | True                     |                                                                                                                                                                                                                                                                                                                                                                                                                                                                                             |
| <i>Parameters</i> -                 | $\approx 1.2 \cdot 10^6$ |                                                                                                                                                                                                                                                                                                                                                                                                                                                                                             |
| Pre-processing                      | Robust scaling           | Record- and channel-wise transformation to distribution of median 0 and IQR 1. Re-sampling uses polyphase filtering (implementation: <code>scipy.signal.resample_poly</code> [Virtanen et al., 2019]).                                                                                                                                                                                                                                                                                      |
| Post-processing                     | None                     |                                                                                                                                                                                                                                                                                                                                                                                                                                                                                             |
| Re-sampling ( $S$ )                 | 100 Hz                   |                                                                                                                                                                                                                                                                                                                                                                                                                                                                                             |
| Batch size ( $B$ )                  | 12                       | For each member of a batch, a class from the label set {W, N1, N2, N3, R} is determined by uniform sampling. A random PSG record that contains the given class is sampled, from which the input window is sampled randomly so that the selected class is present somewhere in the window.                                                                                                                                                                                                   |
| <i>Class sampling prob.</i> -       | Uniform                  |                                                                                                                                                                                                                                                                                                                                                                                                                                                                                             |
| Training epochs                     | $\infty$                 | Training continues until 150 consecutive epochs without validation performance improvements. $L$ is the number of 30 second segments in the dataset.                                                                                                                                                                                                                                                                                                                                        |
| <i>Steps per epoch</i>              | $\lceil L/T/B \rceil$    |                                                                                                                                                                                                                                                                                                                                                                                                                                                                                             |
| Early stopping criteria             | Validation F1            | Mean per-class F1 scores (excluding background) computed over all images of a validation epoch.                                                                                                                                                                                                                                                                                                                                                                                             |
| Model selection criteria            | Validation F1            |                                                                                                                                                                                                                                                                                                                                                                                                                                                                                             |

Table S.4: U-Time per-record results. Values shown are F1/dice scores computed across all PSG records in each dataset. Each cell displays the mean F1  $\pm$  1 standard deviation, with the lowest and highest observed F1 score across the records given in the line below indicated by  $\downarrow$  and  $\uparrow$  respectively.

| Dataset   | W                                                  | N1                                                 | N2                                                 | N3                                                 | REM                                                |
|-----------|----------------------------------------------------|----------------------------------------------------|----------------------------------------------------|----------------------------------------------------|----------------------------------------------------|
| S-EDF-39  | $0.87 \pm 0.13$<br>$\downarrow 0.34 \uparrow 0.99$ | $0.49 \pm 0.16$<br>$\downarrow 0.05 \uparrow 0.81$ | $0.85 \pm 0.11$<br>$\downarrow 0.25 \uparrow 0.94$ | $0.81 \pm 0.17$<br>$\downarrow 0.12 \uparrow 0.96$ | $0.83 \pm 0.16$<br>$\downarrow 0.04 \uparrow 0.97$ |
| S-EDF-153 | $0.89 \pm 0.08$<br>$\downarrow 0.55 \uparrow 0.99$ | $0.51 \pm 0.13$<br>$\downarrow 0.04 \uparrow 0.76$ | $0.83 \pm 0.09$<br>$\downarrow 0.40 \uparrow 0.96$ | $0.57 \pm 0.30$<br>$\downarrow 0.00 \uparrow 1.00$ | $0.79 \pm 0.16$<br>$\downarrow 0.00 \uparrow 0.98$ |
| Physio-18 | $0.78 \pm 0.16$<br>$\downarrow 0.00 \uparrow 0.99$ | $0.57 \pm 0.14$<br>$\downarrow 0.00 \uparrow 0.87$ | $0.81 \pm 0.12$<br>$\downarrow 0.00 \uparrow 0.98$ | $0.69 \pm 0.27$<br>$\downarrow 0.00 \uparrow 1.00$ | $0.78 \pm 0.23$<br>$\downarrow 0.00 \uparrow 1.00$ |
| DCSM      | $0.97 \pm 0.04$<br>$\downarrow 0.67 \uparrow 1.00$ | $0.47 \pm 0.13$<br>$\downarrow 0.00 \uparrow 0.80$ | $0.83 \pm 0.11$<br>$\downarrow 0.29 \uparrow 0.96$ | $0.76 \pm 0.24$<br>$\downarrow 0.00 \uparrow 0.97$ | $0.80 \pm 0.20$<br>$\downarrow 0.00 \uparrow 0.98$ |
| ISRUC     | $0.84 \pm 0.11$<br>$\downarrow 0.42 \uparrow 0.97$ | $0.53 \pm 0.12$<br>$\downarrow 0.11 \uparrow 0.73$ | $0.77 \pm 0.12$<br>$\downarrow 0.07 \uparrow 0.92$ | $0.86 \pm 0.10$<br>$\downarrow 0.42 \uparrow 0.99$ | $0.73 \pm 0.22$<br>$\downarrow 0.00 \uparrow 0.99$ |
| CAP       | $0.70 \pm 0.22$<br>$\downarrow 0.00 \uparrow 0.99$ | $0.28 \pm 0.16$<br>$\downarrow 0.00 \uparrow 0.66$ | $0.74 \pm 0.14$<br>$\downarrow 0.30 \uparrow 0.93$ | $0.79 \pm 0.15$<br>$\downarrow 0.10 \uparrow 0.95$ | $0.73 \pm 0.23$<br>$\downarrow 0.00 \uparrow 0.95$ |
| SVUH-UCD  | $0.73 \pm 0.12$<br>$\downarrow 0.52 \uparrow 0.92$ | $0.46 \pm 0.12$<br>$\downarrow 0.28 \uparrow 0.66$ | $0.75 \pm 0.16$<br>$\downarrow 0.25 \uparrow 0.95$ | $0.79 \pm 0.21$<br>$\downarrow 0.00 \uparrow 0.98$ | $0.67 \pm 0.26$<br>$\downarrow 0.04 \uparrow 0.93$ |

Table S.5: U-Time ( $C = 1$ ) confusion matrix for dataset Sleep-EDF-39

|      | Wake        | N1          | N2           | N3          | REM         |
|------|-------------|-------------|--------------|-------------|-------------|
| Wake | <b>6980</b> | 740         | 244          | 22          | 260         |
| N1   | 205         | <b>1624</b> | 604          | 15          | 356         |
| N2   | 360         | 615         | <b>15182</b> | 982         | 660         |
| N3   | 25          | 7           | 777          | <b>4892</b> | 2           |
| REM  | 204         | 516         | 523          | 0           | <b>6474</b> |

Table S.6: U-Time ( $C = 1$ ) confusion matrix for dataset Sleep-EDF-153

|      | Wake         | N1           | N2           | N3          | REM          |
|------|--------------|--------------|--------------|-------------|--------------|
| Wake | <b>58676</b> | 5650         | 650          | 40          | 790          |
| N1   | 2364         | <b>12067</b> | 5172         | 132         | 1787         |
| N2   | 335          | 5478         | <b>57437</b> | 3491        | 2391         |
| N3   | 10           | 69           | 2974         | <b>9978</b> | 8            |
| REM  | 323          | 2510         | 2280         | 83          | <b>20639</b> |

Table S.7: U-Time ( $C = 1$ ) confusion matrix for dataset Physionet-2018

|      | Wake          | N1           | N2            | N3           | REM          |
|------|---------------|--------------|---------------|--------------|--------------|
| Wake | <b>133594</b> | 20295        | 2473          | 96           | 1487         |
| N1   | 22006         | <b>83149</b> | 22744         | 183          | 8896         |
| N2   | 6834          | 32279        | <b>304191</b> | 25593        | 8924         |
| N3   | 493           | 214          | 17779         | <b>84006</b> | 100          |
| REM  | 3165          | 9095         | 6782          | 138          | <b>97684</b> |

Table S.8: U-Time ( $C = 1$ ) confusion matrix for dataset DCSM

|      | Wake          | N1           | N2           | N3           | REM          |
|------|---------------|--------------|--------------|--------------|--------------|
| Wake | <b>341590</b> | 5681         | 2326         | 316          | 4396         |
| N1   | 2839          | <b>11128</b> | 4804         | 19           | 2350         |
| N2   | 1888          | 6037         | <b>94237</b> | 6586         | 4279         |
| N3   | 195           | 33           | 7156         | <b>36200</b> | 53           |
| REM  | 1931          | 1733         | 2522         | 435          | <b>40205</b> |

Table S.9: U-Time ( $C = 1$ ) confusion matrix for dataset ISRUC

|      | Wake         | N1          | N2           | N3           | REM         |
|------|--------------|-------------|--------------|--------------|-------------|
| Wake | <b>17237</b> | 1892        | 512          | 33           | 751         |
| N1   | 1349         | <b>6505</b> | 2316         | 66           | 1254        |
| N2   | 359          | 2649        | <b>22135</b> | 1878         | 1174        |
| N3   | 38           | 10          | 2332         | <b>14876</b> | 26          |
| REM  | 363          | 974         | 938          | 56           | <b>9589</b> |

Table S.10: U-Time ( $C = 1$ ) confusion matrix for dataset CAP

|      | Wake         | N1          | N2           | N3           | REM          |
|------|--------------|-------------|--------------|--------------|--------------|
| Wake | <b>14126</b> | 1532        | 1779         | 411          | 1004         |
| N1   | 1149         | <b>1412</b> | 997          | 84           | 797          |
| N2   | 1244         | 1351        | <b>28629</b> | 3477         | 2195         |
| N3   | 135          | 32          | 4560         | <b>19069</b> | 296          |
| REM  | 760          | 870         | 2187         | 394          | <b>13429</b> |

Table S.11: U-Time ( $C = 1$ ) confusion matrix for dataset SVUH-UCD

|      | Wake        | N1          | N2          | N3          | REM         |
|------|-------------|-------------|-------------|-------------|-------------|
| Wake | <b>3537</b> | 739         | 227         | 18          | 186         |
| N1   | 783         | <b>1704</b> | 525         | 8           | 383         |
| N2   | 174         | 601         | <b>5423</b> | 410         | 377         |
| N3   | 9           | 7           | 310         | <b>2328</b> | 9           |
| REM  | 207         | 300         | 212         | 22          | <b>2275</b> |

Table S.12: U-Time multi-channel results across 4 datasets. Dataset sizes and evaluation types match those of Table 2 in the main text. Specific channels used: Sleep-EDF-153: EEG Fpz-Cz, EMG submental, EOG horizontal. Physionet-2018: EEG C3-M2, EEG O1-M2, EMG CHEST. DCSM: EEG C3-M2, EOG E2-M2. ISRUC: EEG C3-M2, EOG ROC-M1.

| Dataset   | Channels        | Global F1 scores |      |      |      |      | mean |
|-----------|-----------------|------------------|------|------|------|------|------|
|           |                 | W                | N1   | N2   | N3   | REM  |      |
| S-EDF-153 | EEG + EMG + EOG | 0.92             | 0.51 | 0.82 | 0.72 | 0.84 | 0.76 |
| Physio-18 | 2×EEG + EMG     | 0.83             | 0.58 | 0.83 | 0.79 | 0.83 | 0.77 |
| DCSM      | EEG + EOG       | 0.97             | 0.51 | 0.83 | 0.83 | 0.86 | 0.80 |
| ISRUC     | EEG + EOG       | 0.88             | 0.55 | 0.79 | 0.87 | 0.83 | 0.78 |

Table S.13: Hyperparameter experiments for our re-implemented DeepSleepNet [Kemp et al., 2000] on the Sleep-EDF-39 dataset. The 5-CV hyperparameter experiments were conducted on 25 records only in order to speed up computation. Thus, the performance scores should not be compared directly to the paper re-implementation results (which are based on all 39 records in a 20-CV evaluation), but rather to the *baseline* experiment.

| Experiment                          | Eval. | Global F1 scores |      |      |      |      |      |
|-------------------------------------|-------|------------------|------|------|------|------|------|
|                                     |       | W                | N1   | N2   | N3   | REM  | mean |
| Paper re-implementation             | 20-CV | 0.86             | 0.41 | 0.87 | 0.83 | 0.81 | 0.76 |
| <i>Baseline</i>                     | 5-CV  | 0.85             | 0.39 | 0.86 | 0.89 | 0.79 | 0.76 |
| Smaller CNN filters                 | 5-CV  | 0.84             | 0.31 | 0.86 | 0.87 | 0.77 | 0.73 |
| Larger CNN filters                  | 5-CV  | 0.84             | 0.30 | 0.87 | 0.87 | 0.76 | 0.73 |
| Two CNN layers                      | 5-CV  | 0.84             | 0.26 | 0.85 | 0.85 | 0.76 | 0.71 |
| Four CNN layers                     | 5-CV  | 0.84             | 0.31 | 0.86 | 0.89 | 0.78 | 0.74 |
| One RNN layer                       | 5-CV  | 0.85             | 0.35 | 0.86 | 0.88 | 0.78 | 0.74 |
| Three RNN layers                    | 5-CV  | 0.76             | 0.41 | 0.85 | 0.85 | 0.75 | 0.72 |
| Short sequences ( $T = 10$ )        | 5-CV  | 0.83             | 0.31 | 0.86 | 0.87 | 0.75 | 0.72 |
| Long sequences ( $T = 50$ )         | 5-CV  | 0.83             | 0.34 | 0.86 | 0.86 | 0.74 | 0.73 |
| LSTM $\rightarrow$ GRU              | 5-CV  | 0.84             | 0.35 | 0.86 | 0.87 | 0.74 | 0.73 |
| LSTM 64 cells                       | 5-CV  | 0.85             | 0.32 | 0.85 | 0.84 | 0.78 | 0.73 |
| LSTM 256 cells                      | 5-CV  | 0.85             | 0.31 | 0.86 | 0.86 | 0.77 | 0.73 |
| Dropout $\rightarrow$ Zoneout (5%)  | 5-CV  | 0.80             | 0.34 | 0.85 | 0.88 | 0.77 | 0.73 |
| Dropout $\rightarrow$ Zoneout (10%) | 5-CV  | 0.80             | 0.39 | 0.84 | 0.87 | 0.77 | 0.73 |
| CNN filter size 3-ensemble          | 5-CV  | 0.86             | 0.34 | 0.87 | 0.88 | 0.79 | 0.75 |
| FPZ+CZ+EOG ensemble                 | 5-CV  | 0.91             | 0.40 | 0.89 | 0.85 | 0.87 | 0.78 |

Table S.14: Hyperparameter experiments for our re-implemented DeepSleepNet [Kemp et al., 2000] on the DCSM dataset. The hyperparameter experiments were conducted on a 100-records subset of the DCSM dataset to speed up computation. Thus, performance scores should not be compared to the results in Table 2 directly, but rather to the *baseline* experiment.

| Experiment                   | Eval. | Global F1 scores |      |      |      |      |      |
|------------------------------|-------|------------------|------|------|------|------|------|
|                              |       | W                | N1   | N2   | N3   | REM  | mean |
| <i>Baseline</i>              | 5-CV  | 0.95             | 0.33 | 0.81 | 0.77 | 0.80 | 0.73 |
| Smaller CNN filters          | 5-CV  | 0.95             | 0.37 | 0.80 | 0.79 | 0.81 | 0.74 |
| Larger CNN filters           | 5-CV  | 0.94             | 0.34 | 0.81 | 0.77 | 0.80 | 0.73 |
| LSTM $\rightarrow$ GRU       | 5-CV  | 0.95             | 0.33 | 0.80 | 0.76 | 0.80 | 0.73 |
| Short sequences ( $T = 10$ ) | 5-CV  | 0.95             | 0.32 | 0.80 | 0.75 | 0.78 | 0.72 |
| Long sequences ( $T = 50$ )  | 5-CV  | 0.95             | 0.32 | 0.79 | 0.78 | 0.79 | 0.73 |
| Four input signals ensemble  | 5-CV  | 0.96             | 0.36 | 0.83 | 0.80 | 0.81 | 0.75 |

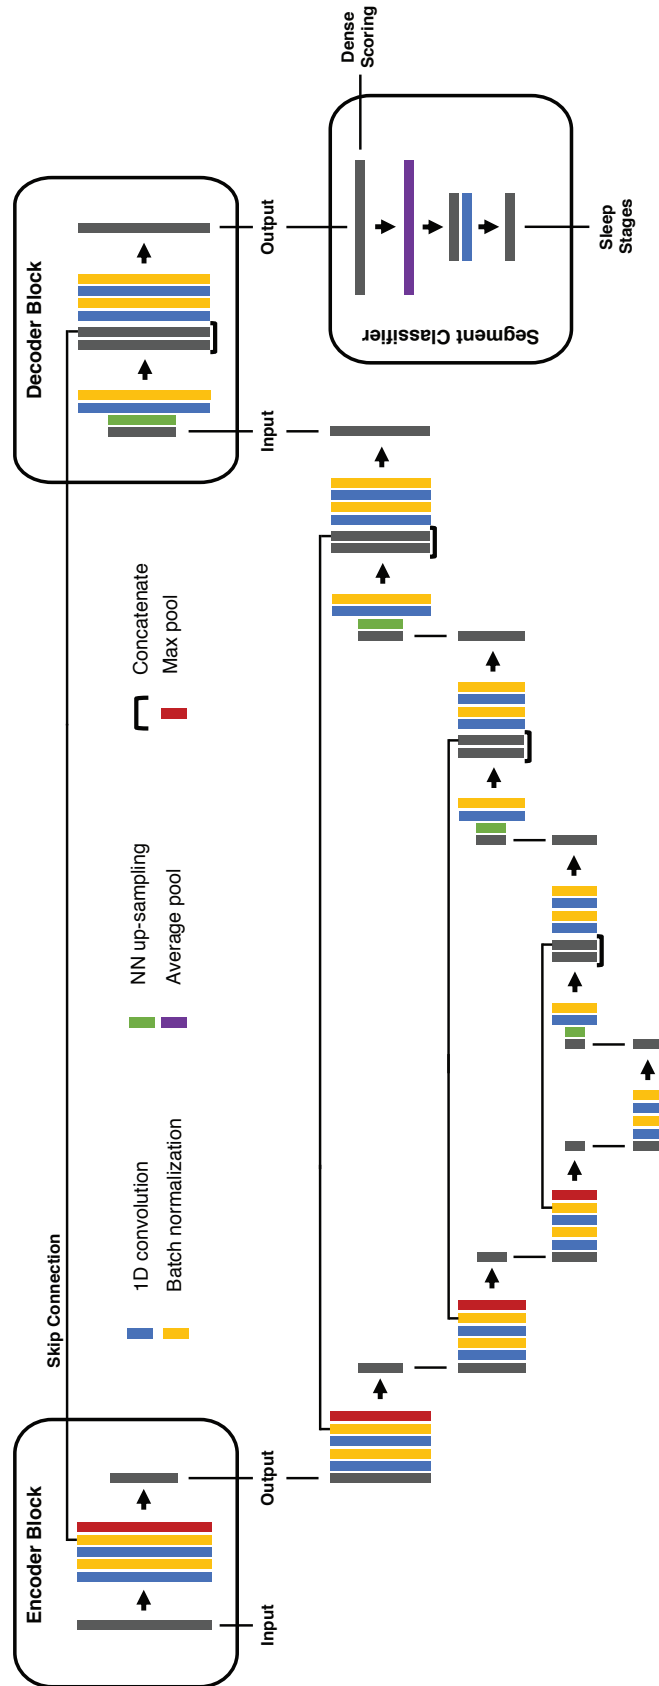

Figure S.2: Expanded structural overview of the U-Time architecture.
